# Supplementary material for: Climate change alters the future of natural floristic regions of deep evolutionary origins
Source: Springer Nature journal article supplement (doi:10.1038/s41467-024-53860-8), 2024-11-02
Supplement: MOESM1 [file 41467_2024_53860_MOESM1_ESM.pdf]

# **Climate change alters the future of natural floristic regions of deep evolutionary origins**

Samuel Minev-Benzecry and Barnabas H. Daru\*

Corresponding author: [bdaru@stanford.edu](mailto:bdaru@stanford.edu)

## **This file includes:**

Supplementary Figs. 1 to 9

Supplementary Tables 1 to 4

Supplementary Note 1

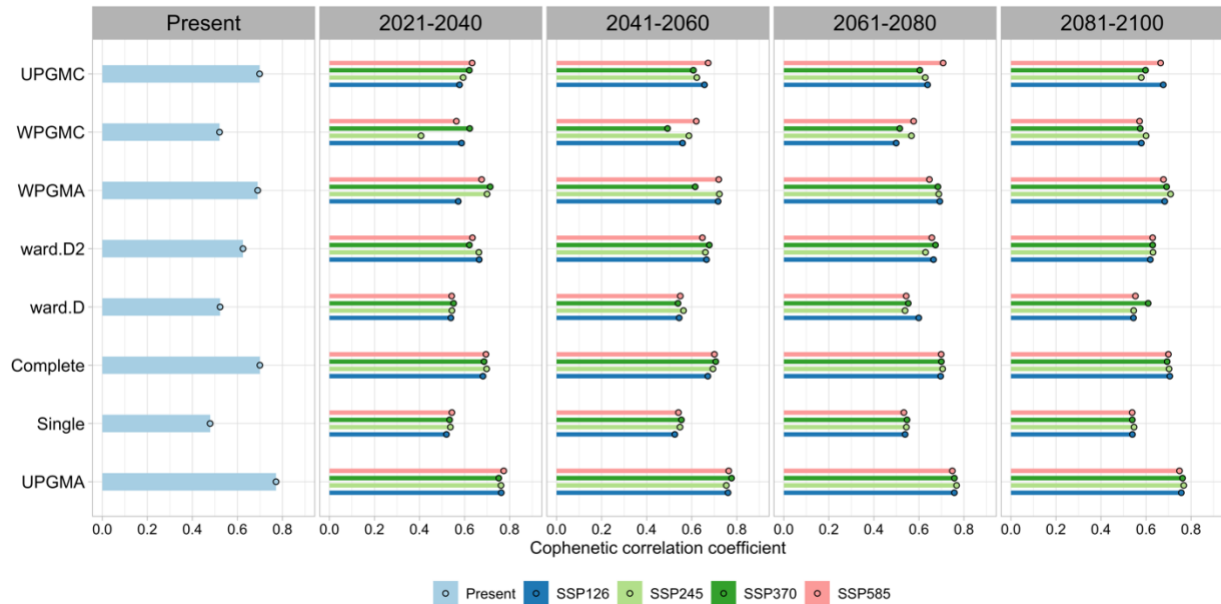

**Supplementary Figure 1. Cluster algorithm selection and validation for clustering phylogenetic beta diversity of vascular plants under present and future climate scenarios.**

The performance of the clustering algorithms ( $n = 8$ ) was quantified using cophenetic correlation coefficient which measures how well each algorithm fits the data, and ranges from 0 to 1. Individual data points are shown using overlaid dot plots. The UPGMA emerges as the best performing algorithm and was used to cluster matrices of Simpson's phylogenetic beta diversity. SSP shared socioeconomic pathways.

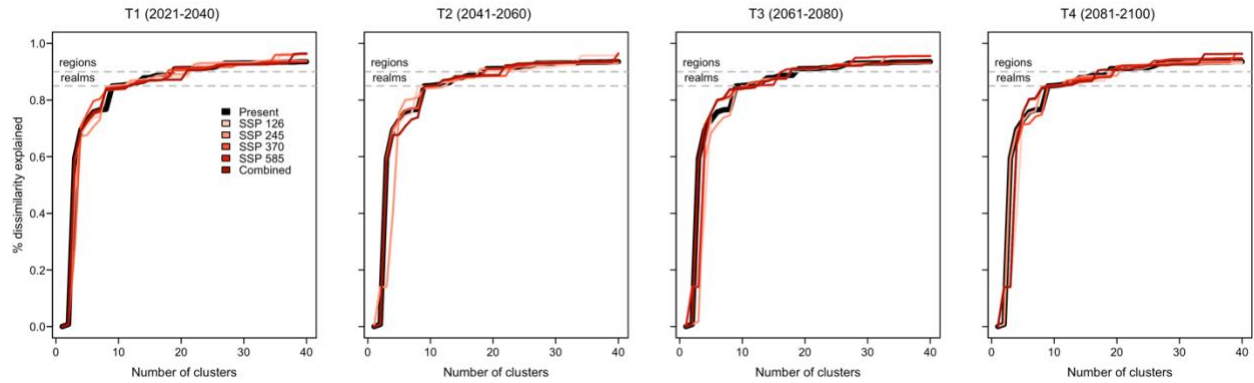

**Supplementary Figure 2. Thresholds identifying the optimal number of clusters for delineating present and future floristic regions.** Comparison of the cutoff points for identifying the optimal number of clusters for delineating present-day floristic regions (in black) versus future floristic regions under varying climate projections (in red). The matrices of Simpson's phylogenetic beta diversity ( $p\beta_{sim}$ ) were agglomerated using unweighted pair group method with arithmetic averages (UPGMA). The cutoff points for the optimal number of clusters were identified based on their ability to explain 85% (all regions) and 90% (for realms) of the total sum of all the  $p\beta_{sim}$  values that returned less than 40 clusters (i.e., species assemblages). The dashed horizontal lines indicate cutoff points where 85% and 90% of total  $p\beta_{sim}$  is found between regions rather than within floristic regions.

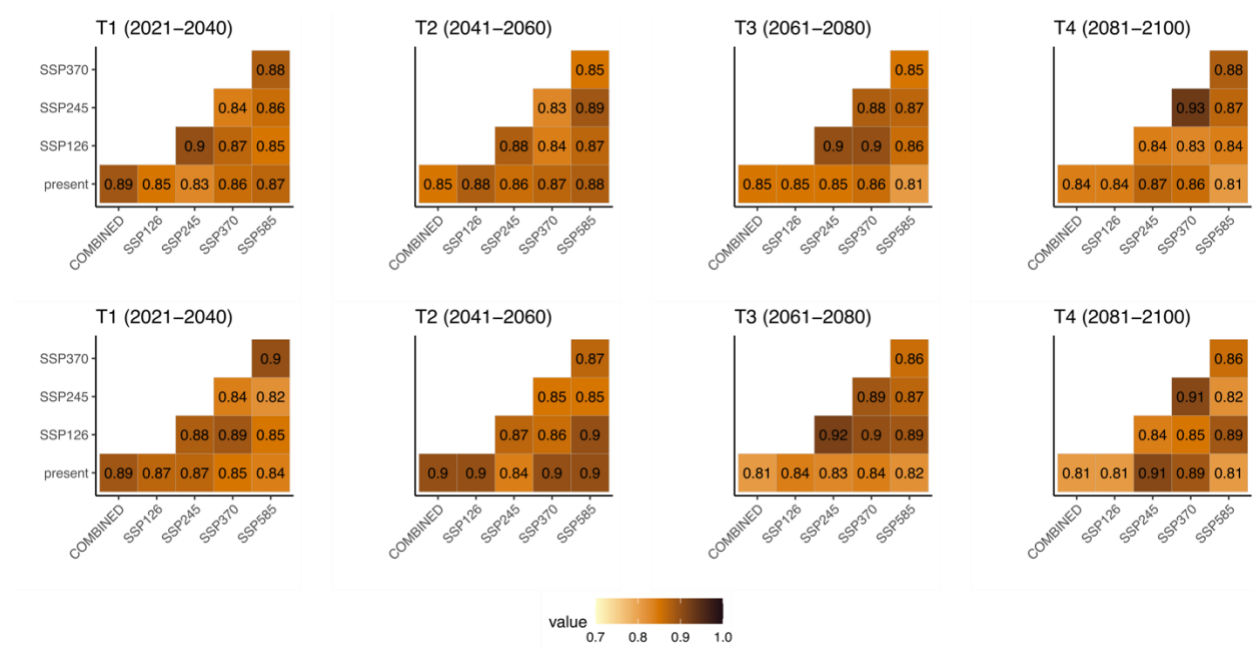

**Supplementary Figure 3. V-measure statistics for spatial congruence of present-day biogeographic regions (first row) and realms (second row) with those projected under future climate scenarios for Simpson's phylogenetic beta diversity.** The v-measure computes the degree of spatial association between regionalizations with scores ranging between 0 and 1 such that larger values indicate spatial congruence.

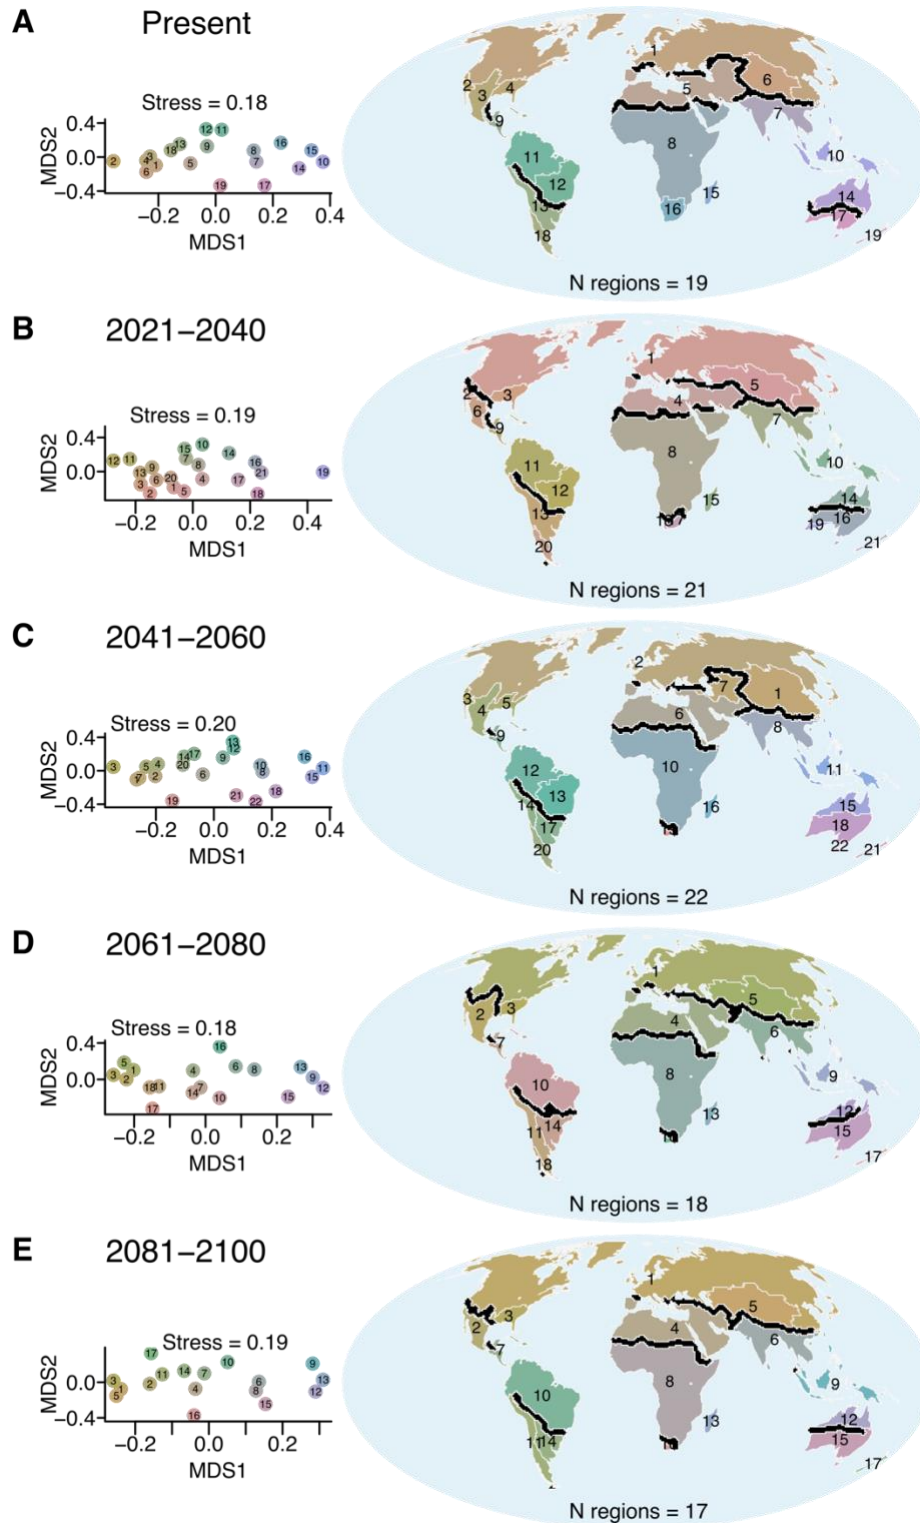

**Supplementary Figure 4. Changes in vascular plant biogeographic regions under current and future climate scenarios in geographic space and in NMDS ordination space. (A)** Global floristic regions of plants in the present-day delineated by clustering modelled range

maps for 189,269 vascular plant species with phylogenetic information and applying pairwise Simpson's  $\beta$ -diversity between 100 km  $\times$  100 km grid cells. Future floristic regions. Future species distributions were predicted by first modeling current plant distributions as a function of current environmental variables and then using this model to predict future plant distributions at new values of climate under different future scenarios and then using that to generate floristic regions for (B) T1: 2021-2040, (C) T2: 2041-2060, (D) T3: 2061-2080, and (E) T4: 2081-2100. The colors in the map and NMDS plots are identical and indicate levels of differentiation of the flora in different floristic regions such that floristic regions with similar colors have similar clades and those with different colors differ in the plant clades they enclose. Black lines separate floristic realms, while white lines separate floristic regions. The numbers in the map and NMDS plot are arbitrary and meant to identify clusters for each time period and do not represent a one-to-one match across time periods. The maps are in the equal-area World Mollweide projection.

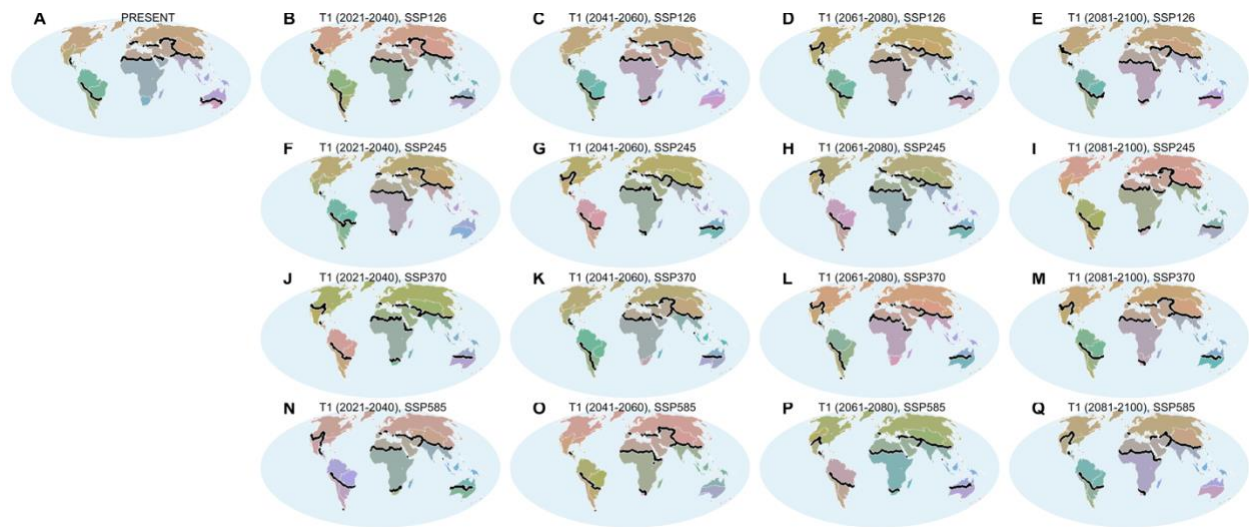

**Supplementary Figure 5. Global floristic regions under present and future climate**

**scenarios based on Simpson's phylogenetic beta diversity.** (A) Global floristic regions of plants in the present-day delineated by clustering predicted range maps for 189,269 vascular plant species with phylogenetic information and applying pairwise phylogenetic dissimilarity between  $100 \text{ km} \times 100 \text{ km}$  grid cells. The colors indicate levels of differentiation of the flora in different floristic regions such that floristic regions with similar colors have similar clades and those with different colors differ in the plant clades they enclose. Black lines separate floristic realms, while white lines separate floristic regions. Future floristic regions projected under scenarios of climate change for (B) T1 (2021-2040) and SSP126, (C) T1 (2041-2060) and SSP126, (D) T1 (2061-2080) and SSP126, (E) T1 (2081-2100) and SSP126, (F) T1 (2021-2040) and SSP245, (G) T1 (2041-2060) and SSP245, (H) T1 (2061-2080) and SSP245, (I) T1 (2081-2100) and SSP245, (J) T1 (2021-2040) and SSP370, (K) T1 (2041-2060) and SSP370, (L) T1 (2061-2080) and SSP370, (M) T1 (2081-2100) and SSP370, (N) T1 (2021-2040) and SSP585, (O) T1 (2041-2060) and SSP585, (P) T1 (2061-2080) and SSP585, and (Q) T1 (2081-2100) and SSP585. The maps are in the equal-area World Mollweide projection.

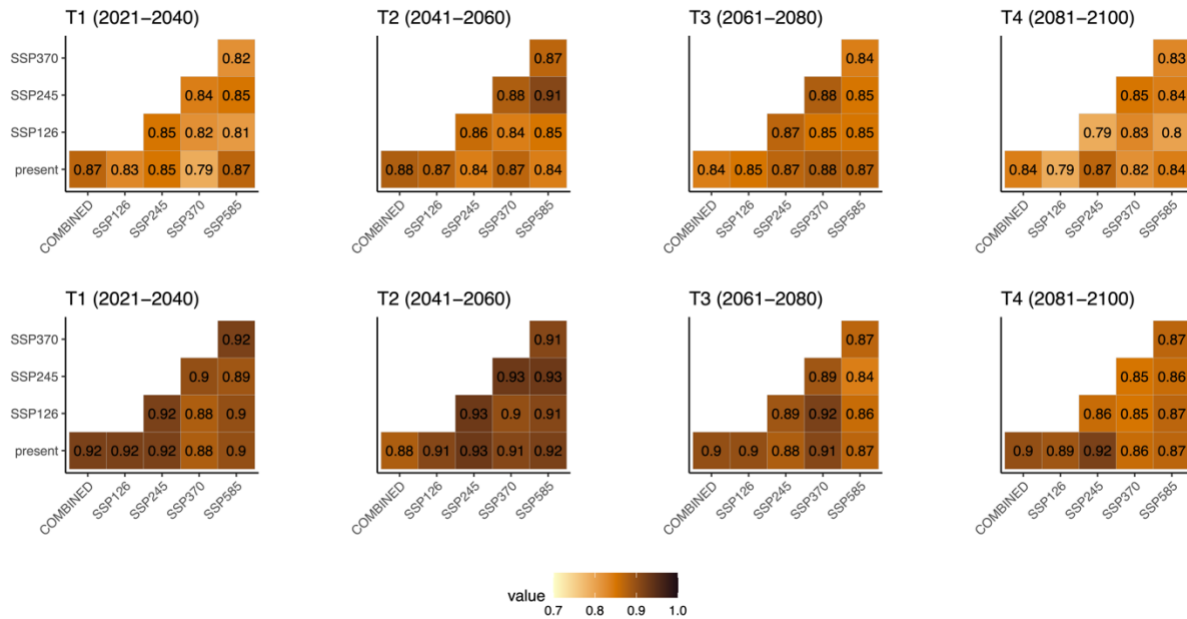

**Supplementary Figure 6. V-measure statistics for spatial congruence of present-day biogeographic regions (first row) and realms (second row) with those projected under future climate scenarios for Sorensen's phylogenetic beta diversity.** The v-measure computes the degree of spatial association between regionalizations with scores ranging between 0 and 1 such that larger values indicate spatial congruence.



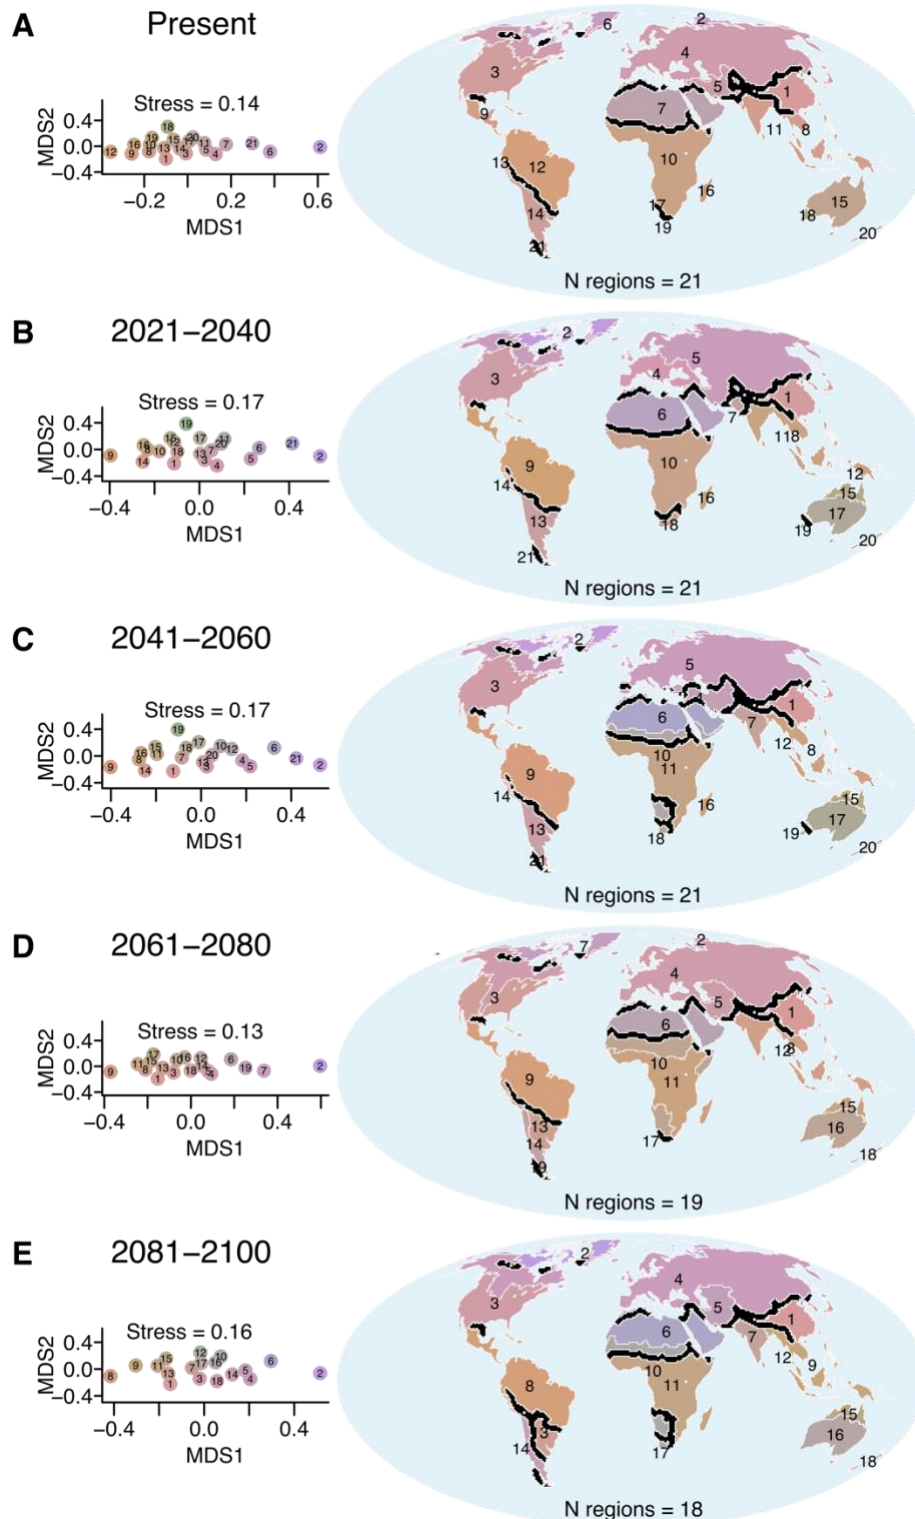

**Supplementary Figure 7. Changes in vascular plant biogeographic regions under current and future climate scenarios in geographic space and in NMDS ordination space. (A)** Global floristic regions of plants in the present-day delineated by clustering modelled range maps for 189,269 vascular plant species with phylogenetic information and applying pairwise

Sorensen's  $\beta$ -diversity between 100 km  $\times$  100 km grid cells. Future floristic regions: Future species distributions were predicted by first modeling current plant distributions as a function of current environmental variables and then using this model to predict future plant distributions at new values of climate under different future scenarios and then using that to generate floristic regions for (B) T1: 2021-2040, (C) T2: 2041-2060, (D) T3: 2061-2080, and (E) T4: 2081-2100. The colors in the map and NMDS plots are identical and indicate levels of differentiation of the flora in different floristic regions such that floristic regions with similar colors have similar clades and those with different colors differ in the plant clades they enclose. Black lines separate floristic realms, while white lines separate floristic regions. The numbers in the map and NMDS plot are arbitrary and meant to identify clusters for each time period and do not represent a one-to-one match across time periods. The maps are in the equal-area World Mollweide projection.

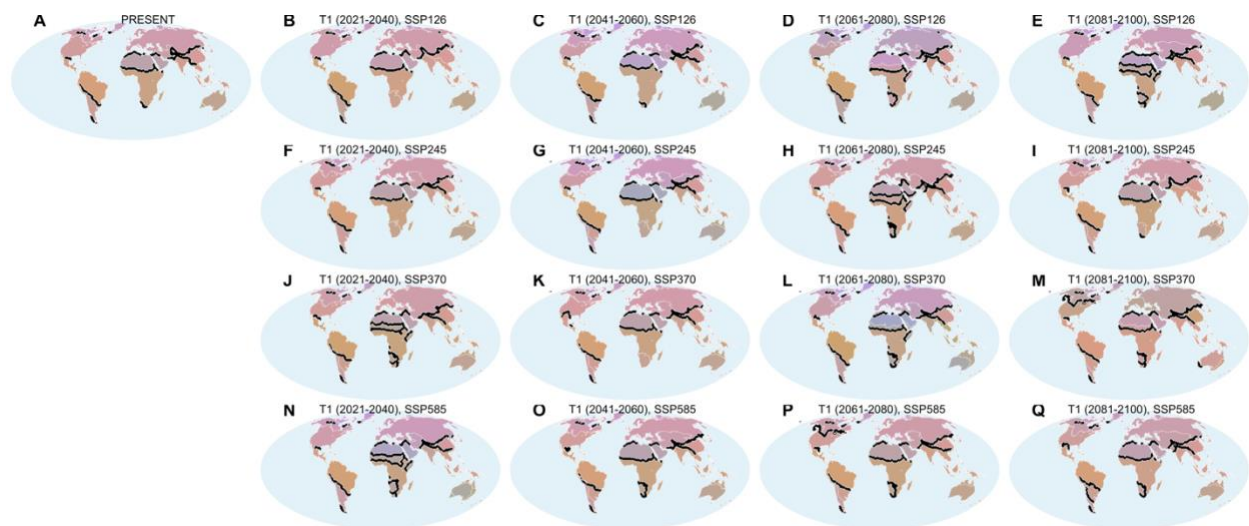

**Supplementary Figure 8. Global floristic regions under present and future climate**

**scenarios based on Sorensen's phylogenetic beta diversity.** (A) Global floristic regions of plants in the present-day delineated by clustering predicted range maps for 189,269 vascular plant species with phylogenetic information and applying pairwise phylogenetic dissimilarity between  $100 \text{ km} \times 100 \text{ km}$  grid cells. The colors indicate levels of differentiation of the flora in different floristic regions such that floristic regions with similar colors have similar clades and those with different colors differ in the plant clades they enclose. Black lines separate floristic realms, while white lines separate floristic regions. Future floristic regions projected under scenarios of climate change for (B) T1 (2021-2040) and SSP126, (C) T1 (2041-2060) and SSP126, (D) T1 (2061-2080) and SSP126, (E) T1 (2081-2100) and SSP126, (F) T1 (2021-2040) and SSP245, (G) T1 (2041-2060) and SSP245, (H) T1 (2061-2080) and SSP245, (I) T1 (2081-2100) and SSP245, (J) T1 (2021-2040) and SSP370, (K) T1 (2041-2060) and SSP370, (L) T1 (2061-2080) and SSP370, (M) T1 (2081-2100) and SSP370, (N) T1 (2021-2040) and SSP585, (O) T1 (2041-2060) and SSP585, (P) T1 (2061-2080) and SSP585, and (Q) T1 (2081-2100) and SSP585. The maps are in the equal-area World Mollweide projection.

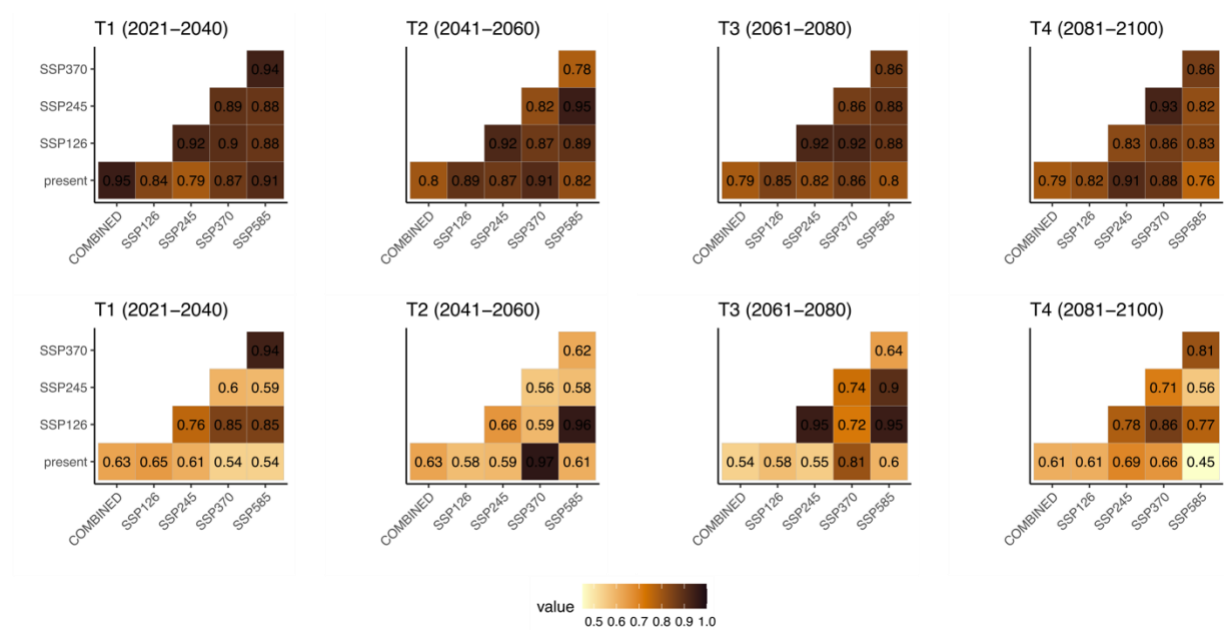

**Supplementary Figure 9. Spatial correlation Simpson index.** Spatial correlations among positions of terrestrial boundaries across the different regionalizations for floristic regions in the present day versus future climate scenarios clustered using Simpson's phylogenetic beta diversity. Top row indicate all region boundaries and bottom row corresponds to realm boundaries. The statistical test used is the Pearson's correlation corrected for spatial autocorrelation. Indicated are the correlation coefficients.

**Supplementary Table 1. Changes in the structure of biogeographic regions under climate change.** Shifts in Simpson's phylogenetic beta diversity assessed by comparing the grid-cell compositional dissimilarity for delineating present vs future floristic regions when considering  $\beta$ -diversity within present-day biogeographic regions. The analysis was conducted by using a two-sided *t*-test, followed by Cohen's *d*, with 1000 bootstrap replicates to estimate effect sizes. Data are presented as Cohen's *d* ranging from 0 (no effect) to +1 or -1 (large effect), with positive values indicating differentiation, whereas negative values indicate homogenization.

| current | future | P value | t     | cluster | Cohens <i>d</i> | N cur | N fut | CI lower | CI upper | year      | region                       |
|---------|--------|---------|-------|---------|-----------------|-------|-------|----------|----------|-----------|------------------------------|
| 0.44    | 0.44   | 0.799   | -0.25 | 1       | 0.00            | 5280  | 5280  | -0.05    | 0.03     | 2021-2040 | Circumboreal 1               |
| 0.53    | 0.53   | 0.723   | 0.36  | 2       | 0.06            | 65    | 65    | -0.3     | 0.43     | 2021-2040 | Californian 2                |
| 0.49    | 0.49   | 0.557   | 0.59  | 3       | 0.05            | 309   | 309   | -0.1     | 0.21     | 2021-2040 | Madrean 3                    |
| 0.50    | 0.50   | 0.156   | -1.42 | 4       | -0.15           | 170   | 170   | -0.36    | 0.06     | 2021-2040 | N American Atlantic 4        |
| 0.48    | 0.48   | 0.173   | 1.36  | 5       | 0.05            | 1521  | 1521  | -0.02    | 0.12     | 2021-2040 | Saharo Arabian 5             |
| 0.49    | 0.49   | 0.071   | 1.81  | 6       | 0.10            | 664   | 664   | -0.005   | 0.21     | 2021-2040 | Turanian-Tibetan 6           |
| 0.53    | 0.53   | 0.317   | 1.00  | 7       | 0.06            | 648   | 648   | -0.06    | 0.17     | 2021-2040 | Indian-Indochinese 7         |
| 0.52    | 0.52   | 0.975   | 0.03  | 8       | 0.00            | 2456  | 2456  | -0.06    | 0.06     | 2021-2040 | Afrotropic 8                 |
| 0.53    | 0.53   | 0.715   | -0.37 | 9       | -0.04           | 161   | 161   | -0.26    | 0.17     | 2021-2040 | Caribbean 9                  |
| 0.60    | 0.60   | 0.728   | -0.35 | 10      | -0.02           | 479   | 479   | -0.15    | 0.11     | 2021-2040 | Malesian 10                  |
| 0.58    | 0.58   | 0.019   | 2.36  | 11      | 0.12            | 783   | 783   | 0.03     | 0.22     | 2021-2040 | Amazonian 11                 |
| 0.59    | 0.59   | 0.232   | -1.20 | 12      | -0.07           | 516   | 516   | -0.21    | 0.04     | 2021-2040 | Brazilian 12                 |
| 0.54    | 0.54   | 0.922   | 0.10  | 13      | 0.01            | 392   | 392   | -0.14    | 0.15     | 2021-2040 | Andean-Chilean 13            |
| 0.60    | 0.60   | 0.329   | -0.98 | 14      | -0.06           | 484   | 484   | -0.18    | 0.06     | 2021-2040 | Monsoonal Tropics-Eremean 14 |
| 0.59    | 0.59   | 0.763   | -0.30 | 15      | -0.05           | 74    | 74    | -0.38    | 0.28     | 2021-2040 | Madagascan 15                |
| 0.57    | 0.57   | 0.589   | 0.54  | 16      | 0.06            | 189   | 189   | -0.14    | 0.26     | 2021-2040 | South African 16             |
| 0.61    | 0.61   | 0.947   | -0.07 | 17      | 0.00            | 360   | 360   | -0.15    | 0.15     | 2021-2040 | South Australian 17          |
| 0.55    | 0.55   | 0.996   | 0.00  | 18      | 0.00            | 177   | 177   | -0.2     | 0.22     | 2021-2040 | Patagonian 18                |
| 0.61    | 0.62   | 0.350   | -0.94 | 19      | -0.19           | 47    | 47    | -0.68    | 0.2      | 2021-2040 | Neozylantic 19               |
| 0.44    | 0.45   | 0.098   | -1.66 | 1       | -0.03           | 5280  | 5280  | -0.07    | 0.0051   | 2041-2060 | Circumboreal 1               |
| 0.53    | 0.53   | 0.748   | -0.32 | 2       | -0.06           | 65    | 65    | -0.44    | 0.32     | 2041-2060 | Californian 2                |
| 0.49    | 0.49   | 0.872   | -0.16 | 3       | -0.01           | 309   | 309   | -0.17    | 0.14     | 2041-2060 | Madrean 3                    |
| 0.50    | 0.50   | 0.107   | -1.61 | 4       | -0.18           | 170   | 170   | -0.38    | 0.04     | 2041-2060 | N American Atlantic 4        |
| 0.48    | 0.48   | 0.321   | 0.99  | 5       | 0.04            | 1521  | 1521  | -0.03    | 0.11     | 2041-2060 | Saharo Arabian 5             |
| 0.49    | 0.49   | 0.579   | 0.55  | 6       | 0.03            | 664   | 664   | -0.08    | 0.13     | 2041-2060 | Turanian-Tibetan 6           |
| 0.53    | 0.53   | 0.588   | 0.54  | 7       | 0.03            | 648   | 648   | -0.08    | 0.14     | 2041-2060 | Indian-Indochinese 7         |
| 0.52    | 0.52   | 0.696   | -0.39 | 8       | -0.01           | 2456  | 2456  | -0.07    | 0.04     | 2041-2060 | Afrotropic 8                 |
| 0.53    | 0.53   | 0.545   | -0.61 | 9       | -0.07           | 161   | 161   | -0.3     | 0.15     | 2041-2060 | Caribbean 9                  |
| 0.60    | 0.60   | 0.488   | -0.69 | 10      | -0.04           | 479   | 479   | -0.17    | 0.1      | 2041-2060 | Malesian 10                  |
| 0.58    | 0.57   | 0.001   | 3.43  | 11      | 0.17            | 783   | 783   | 0.08     | 0.28     | 2041-2060 | Amazonian 11                 |
| 0.59    | 0.59   | 0.098   | -1.65 | 12      | -0.10           | 516   | 516   | -0.23    | 0.02     | 2041-2060 | Brazilian 12                 |
| 0.54    | 0.55   | 0.444   | -0.77 | 13      | -0.05           | 392   | 392   | -0.19    | 0.09     | 2041-2060 | Andean-Chilean 13            |
| 0.60    | 0.60   | 0.134   | -1.50 | 14      | -0.10           | 484   | 484   | -0.23    | 0.02     | 2041-2060 | Monsoonal Tropics-Eremean 14 |
| 0.59    | 0.59   | 0.203   | -1.28 | 15      | -0.21           | 74    | 74    | -0.55    | 0.09     | 2041-2060 | Madagascan 15                |
| 0.57    | 0.57   | 0.957   | -0.05 | 16      | -0.01           | 189   | 189   | -0.21    | 0.2      | 2041-2060 | South African 16             |
| 0.61    | 0.61   | 0.786   | -0.27 | 17      | -0.02           | 360   | 360   | -0.16    | 0.13     | 2041-2060 | South Australian 17          |
| 0.55    | 0.55   | 0.766   | -0.30 | 18      | -0.03           | 177   | 177   | -0.23    | 0.19     | 2041-2060 | Patagonian 18                |
| 0.61    | 0.62   | 0.062   | -1.89 | 19      | -0.39           | 47    | 47    | -0.95    | 0.03     | 2041-2060 | Neozylantic 19               |
| 0.44    | 0.45   | 0.026   | -2.22 | 1       | -0.04           | 5280  | 5280  | -0.08    | -0.007   | 2061-2080 | Circumboreal 1               |
| 0.53    | 0.53   | 0.513   | 0.66  | 2       | 0.12            | 65    | 65    | -0.25    | 0.45     | 2061-2080 | Californian 2                |
| 0.49    | 0.49   | 0.600   | 0.53  | 3       | 0.04            | 309   | 309   | -0.12    | 0.2      | 2061-2080 | Madrean 3                    |
| 0.50    | 0.50   | 0.071   | -1.81 | 4       | -0.20           | 170   | 170   | -0.39    | 0.0059   | 2061-2080 | N American Atlantic 4        |
| 0.48    | 0.48   | 0.091   | 1.69  | 5       | 0.06            | 1521  | 1521  | -0.01    | 0.13     | 2061-2080 | Saharo Arabian 5             |
| 0.49    | 0.49   | 0.341   | 0.95  | 6       | 0.05            | 664   | 664   | -0.06    | 0.16     | 2061-2080 | Turanian-Tibetan 6           |

|      |      |       |       |    |       |      |      |       |        |           |                              |
|------|------|-------|-------|----|-------|------|------|-------|--------|-----------|------------------------------|
| 0.53 | 0.53 | 0.217 | 1.24  | 7  | 0.07  | 648  | 648  | -0.04 | 0.18   | 2061-2080 | Indian-Indochinese 7         |
| 0.52 | 0.52 | 0.743 | -0.33 | 8  | -0.01 | 2456 | 2456 | -0.07 | 0.05   | 2061-2080 | Afrotropic 8                 |
| 0.53 | 0.53 | 0.981 | 0.02  | 9  | 0.00  | 161  | 161  | -0.22 | 0.23   | 2061-2080 | Caribbean 9                  |
| 0.60 | 0.60 | 0.232 | -1.20 | 10 | -0.08 | 479  | 479  | -0.21 | 0.07   | 2061-2080 | Malesian 10                  |
| 0.58 | 0.57 | 0.000 | 4.83  | 11 | 0.24  | 783  | 783  | 0.14  | 0.35   | 2061-2080 | Amazonian 11                 |
| 0.59 | 0.59 | 0.214 | -1.24 | 12 | -0.08 | 516  | 516  | -0.2  | 0.05   | 2061-2080 | Brazilian 12                 |
| 0.54 | 0.54 | 0.764 | -0.30 | 13 | -0.02 | 392  | 392  | -0.16 | 0.11   | 2061-2080 | Andean-Chilean 13            |
| 0.60 | 0.61 | 0.027 | -2.22 | 14 | -0.14 | 484  | 484  | -0.28 | -0.01  | 2061-2080 | Monsoonal Tropics-Eremean 14 |
| 0.59 | 0.59 | 0.057 | -1.92 | 15 | -0.32 | 74   | 74   | -0.66 | 0.0085 | 2061-2080 | Madagascan 15                |
| 0.57 | 0.57 | 0.709 | 0.37  | 16 | 0.04  | 189  | 189  | -0.16 | 0.25   | 2061-2080 | South African 16             |
| 0.61 | 0.61 | 0.920 | -0.10 | 17 | -0.01 | 360  | 360  | -0.16 | 0.14   | 2061-2080 | South Australian 17          |
| 0.55 | 0.55 | 0.998 | 0.00  | 18 | 0.00  | 177  | 177  | -0.2  | 0.2    | 2061-2080 | Patagonian 18                |
| 0.61 | 0.62 | 0.026 | -2.27 | 19 | -0.47 | 47   | 47   | -0.98 | -0.04  | 2061-2080 | Neozylantic 19               |
| 0.44 | 0.45 | 0.000 | -4.96 | 1  | -0.10 | 5280 | 5280 | -0.13 | -0.06  | 2081-2100 | Circumboreal 1               |
| 0.53 | 0.53 | 0.548 | 0.60  | 2  | 0.11  | 65   | 65   | -0.26 | 0.43   | 2081-2100 | Californian 2                |
| 0.49 | 0.49 | 0.845 | 0.20  | 3  | 0.02  | 309  | 309  | -0.15 | 0.18   | 2081-2100 | Madrean 3                    |
| 0.50 | 0.50 | 0.026 | -2.23 | 4  | -0.24 | 170  | 170  | -0.46 | -0.02  | 2081-2100 | N American Atlantic 4        |
| 0.48 | 0.48 | 0.075 | 1.78  | 5  | 0.06  | 1521 | 1521 | -0.01 | 0.14   | 2081-2100 | Saharo Arabian 5             |
| 0.49 | 0.49 | 0.763 | -0.30 | 6  | -0.02 | 664  | 664  | -0.13 | 0.09   | 2081-2100 | Turanian-Tibetan 6           |
| 0.53 | 0.53 | 0.300 | 1.04  | 7  | 0.06  | 648  | 648  | -0.05 | 0.17   | 2081-2100 | Indian-Indochinese 7         |
| 0.52 | 0.52 | 0.620 | -0.50 | 8  | -0.01 | 2456 | 2456 | -0.07 | 0.04   | 2081-2100 | Afrotropic 8                 |
| 0.53 | 0.53 | 0.726 | 0.35  | 9  | 0.04  | 161  | 161  | -0.19 | 0.27   | 2081-2100 | Caribbean 9                  |
| 0.60 | 0.60 | 0.376 | -0.89 | 10 | -0.06 | 479  | 479  | -0.18 | 0.08   | 2081-2100 | Malesian 10                  |
| 0.58 | 0.57 | 0.000 | 5.62  | 11 | 0.28  | 783  | 783  | 0.18  | 0.39   | 2081-2100 | Amazonian 11                 |
| 0.59 | 0.59 | 0.220 | -1.23 | 12 | -0.08 | 516  | 516  | -0.19 | 0.04   | 2081-2100 | Brazilian 12                 |
| 0.54 | 0.55 | 0.178 | -1.35 | 13 | -0.10 | 392  | 392  | -0.24 | 0.05   | 2081-2100 | Andean-Chilean 13            |
| 0.60 | 0.61 | 0.008 | -2.64 | 14 | -0.17 | 484  | 484  | -0.29 | -0.04  | 2081-2100 | Monsoonal Tropics-Eremean 14 |
| 0.59 | 0.59 | 0.029 | -2.20 | 15 | -0.36 | 74   | 74   | -0.72 | -0.04  | 2081-2100 | Madagascan 15                |
| 0.57 | 0.57 | 0.520 | 0.64  | 16 | 0.07  | 189  | 189  | -0.13 | 0.27   | 2081-2100 | South African 16             |
| 0.61 | 0.61 | 0.839 | -0.20 | 17 | -0.02 | 360  | 360  | -0.17 | 0.13   | 2081-2100 | South Australian 17          |
| 0.55 | 0.55 | 0.470 | -0.72 | 18 | -0.08 | 177  | 177  | -0.29 | 0.13   | 2081-2100 | Patagonian 18                |
| 0.61 | 0.62 | 0.013 | -2.54 | 19 | -0.52 | 47   | 47   | -1.02 | -0.09  | 2081-2100 | Neozylantic 19               |

**Supplementary Table 2. Spatial correlations among positions of terrestrial boundaries across the different regionalizations for floristic regions.** The statistical test used is the Pearson's correlation corrected for spatial autocorrelation. Indicated are the correlation coefficients, p values, estimated degrees of freedom (e.d.f) and estimated effective sample size (E.S.S.). All p-values correspond to two-sided tests unless otherwise specified.

| <b>Time horizon</b> | <b>scenario1</b> | <b>scenario2</b> | <b>Correlation coefficient</b> | <b>P value</b> | <b>edf</b> | <b>ESS</b> |
|---------------------|------------------|------------------|--------------------------------|----------------|------------|------------|
| 2021-2040           | present          | SSP126           | 0.84                           | 3.42E-19       | 67.47      | 69.47      |
|                     | present          | SSP245           | 0.79                           | 3.22E-16       | 67.43      | 69.43      |
|                     | present          | SSP370           | 0.87                           | 2.39E-21       | 65.27      | 67.27      |
|                     | present          | SSP585           | 0.91                           | 3.71E-25       | 60.76      | 62.76      |
|                     | present          | COMBINED         | 0.95                           | 2.05E-27       | 52.88      | 54.88      |
|                     | SSP126           | SSP245           | 0.92                           | 4.63E-31       | 72.30      | 74.30      |
|                     | SSP126           | SSP370           | 0.90                           | 9.89E-29       | 74.75      | 76.75      |
|                     | SSP126           | SSP585           | 0.88                           | 1.62E-24       | 72.15      | 74.15      |
|                     | SSP245           | SSP370           | 0.89                           | 6.23E-27       | 74.89      | 76.89      |
|                     | SSP245           | SSP585           | 0.88                           | 4.64E-25       | 71.81      | 73.81      |
|                     | SSP370           | SSP585           | 0.94                           | 3.23E-33       | 68.75      | 70.75      |
|                     |                  |                  |                                |                |            |            |
| 2041-2060           | present          | SSP126           | 0.89                           | 2.15E-24       | 64.94      | 66.94      |
|                     | present          | SSP245           | 0.87                           | 1.07E-19       | 59.40      | 61.40      |
|                     | present          | SSP370           | 0.91                           | 2.87E-24       | 58.04      | 60.04      |
|                     | present          | SSP585           | 0.82                           | 2.74E-19       | 72.72      | 74.72      |
|                     | present          | COMBINED         | 0.80                           | 6.86E-16       | 64.01      | 66.01      |
|                     | SSP126           | SSP245           | 0.92                           | 9.14E-29       | 67.02      | 69.02      |
|                     | SSP126           | SSP370           | 0.87                           | 6.95E-22       | 66.53      | 68.53      |
|                     | SSP126           | SSP585           | 0.89                           | 1.47E-28       | 80.37      | 82.37      |
|                     | SSP245           | SSP370           | 0.82                           | 1.06E-16       | 62.25      | 64.25      |
|                     | SSP245           | SSP585           | 0.95                           | 6.39E-37       | 70.21      | 72.21      |
|                     | SSP370           | SSP585           | 0.78                           | 2.85E-17       | 75.12      | 77.12      |
|                     |                  |                  |                                |                |            |            |
| 2061-2080           | present          | SSP126           | 0.85                           | 3.36E-18       | 59.49      | 61.49      |

|           |         |          |      |          |       |       |
|-----------|---------|----------|------|----------|-------|-------|
|           | present | SSP245   | 0.82 | 2.93E-15 | 57.53 | 59.53 |
|           | present | SSP370   | 0.86 | 1.47E-23 | 74.60 | 76.60 |
|           | present | SSP585   | 0.80 | 6.04E-15 | 60.45 | 62.45 |
|           | present | COMBINED | 0.79 | 1.70E-15 | 63.91 | 65.91 |
|           | SSP126  | SSP245   | 0.92 | 1.02E-24 | 57.03 | 59.03 |
|           | SSP126  | SSP370   | 0.92 | 3.83E-34 | 78.49 | 80.49 |
|           | SSP126  | SSP585   | 0.88 | 7.54E-22 | 63.53 | 65.53 |
|           | SSP245  | SSP370   | 0.86 | 2.39E-24 | 76.60 | 78.60 |
|           | SSP245  | SSP585   | 0.88 | 2.33E-21 | 59.75 | 61.75 |
|           | SSP370  | SSP585   | 0.86 | 2.49E-24 | 77.34 | 79.34 |
|           |         |          |      |          |       |       |
| 2081-2100 | present | SSP126   | 0.82 | 3.41E-18 | 66.89 | 68.89 |
|           | present | SSP245   | 0.91 | 3.92E-24 | 59.48 | 61.48 |
|           | present | SSP370   | 0.88 | 8.28E-28 | 78.92 | 80.92 |
|           | present | SSP585   | 0.76 | 5.21E-14 | 66.47 | 68.47 |
|           | present | COMBINED | 0.79 | 1.20E-15 | 66.21 | 68.21 |
|           | SSP126  | SSP245   | 0.83 | 3.54E-19 | 67.71 | 69.71 |
|           | SSP126  | SSP370   | 0.86 | 9.40E-29 | 90.87 | 92.87 |
|           | SSP126  | SSP585   | 0.83 | 7.22E-23 | 82.35 | 84.35 |
|           | SSP245  | SSP370   | 0.93 | 2.02E-36 | 79.22 | 81.22 |
|           | SSP245  | SSP585   | 0.82 | 4.53E-18 | 67.75 | 69.75 |
|           | SSP370  | SSP585   | 0.86 | 4.90E-27 | 85.76 | 87.76 |



**Supplementary Table 3. Spatial correlations among positions of terrestrial boundaries across the different regionalizations for floristic realms.** The statistical test used is the Pearson's correlation corrected for spatial autocorrelation. Indicated are the correlation coefficients, p values, estimated degrees of freedom (e.d.f) and estimated effective sample size (E.S.S.). All p-values correspond to two-sided tests unless otherwise specified.

| Time horizon | scenario1 | scenario2 | Correlation coefficient | P value  | edf   | ESS   |
|--------------|-----------|-----------|-------------------------|----------|-------|-------|
| 2021-2040    | present   | SSP126    | 0.65                    | 9.67E-05 | 28.06 | 30.06 |
|              | present   | SSP245    | 0.61                    | 9.57E-04 | 24.33 | 26.33 |
|              | present   | SSP370    | 0.54                    | 5.29E-04 | 34.92 | 36.92 |
|              | present   | SSP585    | 0.54                    | 4.27E-04 | 36.58 | 38.58 |
|              | present   | COMBINED  | 0.63                    | 1.40E-04 | 29.40 | 31.40 |
|              | SSP126    | SSP245    | 0.76                    | 5.65E-09 | 39.80 | 41.80 |
|              | SSP126    | SSP370    | 0.85                    | 2.84E-14 | 44.75 | 46.75 |
|              | SSP126    | SSP585    | 0.85                    | 1.13E-13 | 42.92 | 44.92 |
|              | SSP245    | SSP370    | 0.60                    | 7.34E-07 | 55.23 | 57.23 |
|              | SSP245    | SSP585    | 0.59                    | 2.73E-07 | 61.20 | 63.20 |
|              | SSP370    | SSP585    | 0.94                    | 1.48E-22 | 43.88 | 45.88 |
|              |           |           |                         |          |       |       |
| 2041-2060    | present   | SSP126    | 0.58                    | 1.05E-03 | 26.63 | 28.63 |
|              | present   | SSP245    | 0.59                    | 1.70E-04 | 33.87 | 35.87 |
|              | present   | SSP370    | 0.97                    | 8.66E-10 | 13.36 | 15.36 |
|              | present   | SSP585    | 0.61                    | 7.53E-04 | 25.08 | 27.08 |
|              | present   | COMBINED  | 0.63                    | 5.03E-04 | 24.64 | 26.64 |
|              | SSP126    | SSP245    | 0.66                    | 2.40E-08 | 55.70 | 57.70 |
|              | SSP126    | SSP370    | 0.59                    | 9.97E-04 | 25.45 | 27.45 |
|              | SSP126    | SSP585    | 0.96                    | 1.70E-09 | 14.42 | 16.42 |
|              | SSP245    | SSP370    | 0.56                    | 4.35E-04 | 33.95 | 35.95 |
|              | SSP245    | SSP585    | 0.58                    | 4.52E-07 | 62.27 | 64.27 |
|              | SSP370    | SSP585    | 0.62                    | 7.24E-04 | 23.61 | 25.61 |
|              |           |           |                         |          |       |       |
| 2061-2080    | present   | SSP126    | 0.58                    | 1.71E-04 | 35.45 | 37.45 |

|           |         |          |      |          |       |       |
|-----------|---------|----------|------|----------|-------|-------|
|           | present | SSP245   | 0.55 | 6.16E-04 | 32.91 | 34.91 |
|           | present | SSP370   | 0.81 | 1.99E-06 | 21.67 | 23.67 |
|           | present | SSP585   | 0.60 | 1.49E-04 | 32.26 | 34.26 |
|           | present | COMBINED | 0.54 | 6.67E-04 | 33.84 | 35.84 |
|           | SSP126  | SSP245   | 0.95 | 6.69E-24 | 43.63 | 45.63 |
|           | SSP126  | SSP370   | 0.72 | 2.20E-07 | 37.39 | 39.39 |
|           | SSP126  | SSP585   | 0.95 | 5.25E-26 | 47.14 | 49.14 |
|           | SSP245  | SSP370   | 0.74 | 2.02E-07 | 34.21 | 36.21 |
|           | SSP245  | SSP585   | 0.90 | 1.22E-17 | 45.67 | 47.67 |
|           | SSP370  | SSP585   | 0.64 | 7.49E-06 | 38.97 | 40.97 |
|           |         |          |      |          |       |       |
| 2081-2100 | present | SSP126   | 0.61 | 2.66E-04 | 29.30 | 31.30 |
|           | present | SSP245   | 0.69 | 2.48E-04 | 21.64 | 23.64 |
|           | present | SSP370   | 0.66 | 1.34E-05 | 34.25 | 36.25 |
|           | present | SSP585   | 0.45 | 7.08E-03 | 31.98 | 33.98 |
|           | present | COMBINED | 0.61 | 4.36E-04 | 27.34 | 29.34 |
|           | SSP126  | SSP245   | 0.78 | 1.01E-08 | 35.56 | 37.56 |
|           | SSP126  | SSP370   | 0.86 | 2.15E-14 | 44.54 | 46.54 |
|           | SSP126  | SSP585   | 0.77 | 2.12E-10 | 45.00 | 47.00 |
|           | SSP245  | SSP370   | 0.71 | 1.47E-09 | 51.83 | 53.83 |
|           | SSP245  | SSP585   | 0.56 | 1.97E-04 | 37.87 | 39.87 |
|           | SSP370  | SSP585   | 0.81 | 2.36E-13 | 49.64 | 51.64 |

**Supplementary Table 4. List of predictor variables hypothesized to affect plant biogeographic boundaries.**

| Code                | Variable description                                       | Resolution | References |
|---------------------|------------------------------------------------------------|------------|------------|
| Tectonic separation | Tectonic movements                                         |            | 88         |
| ELEV                | Topography                                                 | 5 arcmin   | 58         |
| VELOCITY            | Past climate velocity during the late Quaternary           | 5 arcmin   | 40         |
| BIO1                | Annual Mean Temperature                                    | 5 arcmin   | 58         |
| BIO2                | Mean Diurnal Range (Mean of monthly (max temp - min temp)) | 5 arcmin   | 58         |
| BIO3                | Isothermality (BIO2/BIO7) ( $\times 100$ )                 | 5 arcmin   | 58         |
| BIO4                | Temperature Seasonality (standard deviation $\times 100$ ) | 5 arcmin   | 58         |
| BIO5                | Max Temperature of Warmest Month                           | 5 arcmin   | 58         |
| BIO6                | Min Temperature of Coldest Month                           | 5 arcmin   | 58         |
| BIO7                | Temperature Annual Range (BIO5-BIO6)                       | 5 arcmin   | 58         |
| BIO8                | Mean Temperature of Wettest Quarter                        | 5 arcmin   | 58         |
| BIO9                | Mean Temperature of Driest Quarter                         | 5 arcmin   | 58         |
| BIO10               | Mean Temperature of Warmest Quarter                        | 5 arcmin   | 58         |
| BIO11               | Mean Temperature of Coldest Quarter                        | 5 arcmin   | 58         |
| BIO12               | Annual Precipitation                                       | 5 arcmin   | 58         |
| BIO13               | Precipitation of Wettest Month                             | 5 arcmin   | 58         |
| BIO14               | Precipitation of Driest Month                              | 5 arcmin   | 58         |
| BIO15               | Precipitation Seasonality (Coefficient of Variation)       | 5 arcmin   | 58         |
| BIO16               | Precipitation of Wettest Quarter                           | 5 arcmin   | 58         |
| BIO17               | Precipitation of Driest Quarter                            | 5 arcmin   | 58         |
| BIO18               | Precipitation of Warmest Quarter                           | 5 arcmin   | 58         |
| BIO19               | Precipitation of Coldest Quarter                           | 5 arcmin   | 58         |

## Supplementary Note 1

### **Climate change alters the future of natural floristic regions of deep evolutionary origins – ODMAP Protocol –**

Samuel Minev-Benzecry , Barnabas Daru

2024-09-28

---

#### **Overview**

##### *Authorship*

Contact : [bdaru@stanford.edu](mailto:bdaru@stanford.edu)

##### *Model objective*

Model objective: Forecast and transfer

Target output: Projections of patterns of vascular plant diversity

##### *Focal Taxon*

Focal Taxon: Vascular plants

##### *Location*

Location: Global

##### *Scale of Analysis*

Spatial extent: -180, 180, -90, 90 (xmin, xmax, ymin, ymax)

Spatial resolution: 5-arc minute (~9 km)

Temporal extent: Present-day conditions (1970-2000) and four future climate scenarios (T1: 2021-2040, T2: 2041-2060, T3: 2061-2080, and T4: 2081-2100) based on MIROC6 and four Shared Socioeconomic Pathways (SSP 126, 245, 370 and 585). These pathways represent varying levels of climate mitigation, ranging from strong mitigation (SSP126) to moderate (SSP245 and SSP370) and high emissions (SSP585) scenarios

Boundary: natural

### *Biodiversity data*

Observation type: range map, standardised monitoring data

Response data type: point occurrence, presence-only, richness

### *Predictors*

Predictor types: climatic, habitat, topographic

### *Hypotheses*

We hypothesize that if species' climatically suitable habitats contract under worsening climate conditions,  $\beta$ -diversity will likely increase, leading to the compositional differentiation of biogeographic regions. Conversely, in areas where species ranges expand to colonize new climatically suitable areas,  $\beta$ -diversity will decrease, and the composition of species assemblages will experience homogenization across geographic space. Climate change can also redefine biogeographic boundaries by rearranging species distributions without changes in their number. Altogether, we predict that climate change can homogenize, differentiate, and redefine biogeographic regions resulting in different biogeographic regions than we see today.

### *Assumptions*

- 1) Biologically meaningful climatic predictors for plant species were used in the models.
- 2) Individual SDM were produced and stacked into unique layers depicting the global distribution and diversity patterns of vascular plant species.
- 3) The performance of the individual models was high across the 3 algorithms, both in cross-validation and the final predictions.
- 4) The integration of dispersal constraints using spherical Brownian motion model along with information on the natural habitat of species further improved performance

### *Algorithms*

Modelling techniques: maxent

Model complexity: We used maximum entropy (MaxEnt v.3.4.3) to model plant species distributions. MaxEnt is not computationally expensive and has been shown to outperform other algorithms in modeling species distributions for computational efficiency especially when

dealing with a huge number of species spanning hundreds of thousands of species as in this study and is robust for modelling distributions for species with relatively few occurrence records. Model averaging: We generated five sets of models for each species and took the median to account for uncertainties across different model runs.

### *Workflow*

We used maximum entropy (MaxEnt v.3.4.3) to model plant species distributions. MaxEnt is not computationally expensive and has been shown to outperform other algorithms in modeling species distributions for computational efficiency especially when dealing with a huge number of species spanning hundreds of thousands of species as in this study and is robust for modelling distributions for species with relatively few occurrence record. Predictor variables for the modeling were downloaded from WorldClim v.2.1 at a spatial grain resolution of 5-arcmin (equivalent to 10 km at the equator) for present-day conditions (1970-2000) and four future climate scenarios (T1: 2021-2040, T2: 2041-2060, T3: 2061-2080, and T4: 2081-2100) based on MIROC6 and four Shared Socioeconomic Pathways (SSP 126, 245, 370 and 585). These pathways represent varying levels of climate mitigation, ranging from strong mitigation (SSP126) to moderate (SSP245 and SSP370) and high emissions (SSP585) scenarios. We considered 20 predictor variables which are hypothesized to be important for plant distributions and diversity in previous studies. From these predictor variables, we removed areas corresponding to inland waters, i.e., lakes (using vector polygons from <https://naturalearthdata.com>). Variance Inflation Factor (VIF) was calculated among predictor pairs to remove highly autocorrelated predictors using the R package usdm version 2.1-6. Plant occurrence records used for the modeling were compiled from the Global Biodiversity Information Facility (GBIF, <https://doi.org/10.15468/dl.jqqjba>, accessed 2 June 2024) using the query term “Tracheophyta”. This yielded 454 million records from 14,405 published datasets. However, we previously showed that raw point occurrences of plants suffer from inherent coverage gaps and sampling biases that can hinder their ability to accurately represent global biodiversity patterns. To this end, we used a multi-step workflow to address these limitations as follows: (i) Source data: The raw occurrence data used to produce the species’ range polygons were obtained from GBIF (<https://doi.org/10.15468/dl.jqqjba>, accessed 2 June 2024). (ii) Data cleaning: These records were thoroughly cleaned by matching species names from the GBIF

occurrences to those in the World Checklist of Vascular Plants (WCVP) and keeping only verified names from WCVP. At the same time, the point records were refined to capture native distributions by intersecting them with WCVP's native range maps of vascular plants within country borders and retaining points that overlap WCVP's range maps. (iii) Polygon maps: After data cleaning, we converted the point records into polygon maps by modeling with alpha hulls using the R package rangeBuilder v.2.1. We cropped each species' polygon map to land areas using a basemap from naturalearth (<https://naturalearthdata.com>). Finally, we systematically sampled these polygon maps to generate 500 points per species for input into the species distribution model (SDM) as in previous studies rather than using the raw and biased point occurrences. (iv) Species-specific dispersal rate: We incorporated a partial-dispersal model to prevent erroneous predictions in suitable but unoccupied areas. Specifically, we calculated species-specific dispersal rates using a spherical Brownian motion model (SBM) implemented with the R package castor v.1.7.10. Unlike the widely used Brownian Motion models of continuous trait evolution that encode geographic locations in orthogonal space, the SBM model quantifies the dispersal of a clade over time as a diffusion-like process based on a single diffusion coefficient  $D$ , while accounting for Earth's spherical geometry. The SBM model was fitted using the function `fit_sbm_const` in the R package castor v.1.7.10. (v) Calibration area: The resulting dispersal rate, defined as the expected dispersal distance traversed by a species in a year (expressed in km/year), was used to define calibration areas (i.e., training areas) for modelling species distributions for each species across different timeframes. This was achieved by buffering the dispersal rates around the alpha hull polygons of each species and intersecting the buffered zones with maps of the terrestrial ecoregions of the world overlapped by the species to predict habitat suitability of each species. This latter step was intended as an additional fine-tuning process to allow us capture the natural habitats of each species based on their overlap with the ecoregions. (vi) Background points: We generated background points as a function of global plant sampling intensity to account for the biased sampling in the input occurrence records using spatial kernel density estimation and probabilistic sampling of 10,000 background points for each species within their calibration areas. (vii) Species distribution modeling: Species distribution modeling was conducted to estimate species distributions based on environmental conditions that correlate with known occurrences, and calibrated to species' realized niche based on the calibration area defined using the species-specific dispersal rates. From the occurrence

data as input, we used a 75% random sample for model development, while retaining the remaining 25% sample for model evaluation. For each species, we built models using a combination of hyperparameters in terms of the feature classes and regularization multiplier settings in MaxEnt v.3.4.3 as follows: linear, threshold, and hinge responses, and tested a set of regularization multiplier values (2, 5, 10, 15, 20) under a 5-folds cross-validation framework. Our models were predicted over each species' occurrences as a function of present-day bioclimatic variables and using these combinations of settings on a continuous scale between 0 and 1 using the sdm function in phyloregion v.1.0.9. We generated five sets of models for each species and took the median to account for uncertainties across different model runs. While ensemble methods that integrate and average predictions from multiple models are valuable, this can be computationally expensive and impractical for large datasets as in our study. With hundreds of thousands of species spanning five time horizons and four climate scenarios, creating ensembles for each would be computationally expensive and time-consuming. Moreover, if the individual models within the ensemble are highly similar, the ensemble may not provide much additional benefit compared to a single model. Therefore, we decided to run each model five times and take the median as a more efficient approach. For future climate scenarios, we modelled plant distributions as a function of present climate variables, and then used these models to predict plant distributions at new values of climate under different future scenarios for T1–T4 and SSP126, SSP245, SSP370, and SSP585. The model prediction consisted of a range map stored in raster format at a 5-arc minute grid cell resolution. The suitability of the models for each species was converted to binary presences by using the 95% quantile of the suitability values extracted from the underlying occurrences records as presence threshold. The final dataset contains range maps for 189,269 species, for the present, and four future time horizons each with four SSPs resulting in a total of 3,217,573 range maps for the analysis of biogeographical regionalization under climate change.

### *Software*

All analyses were performed in R (R Development Core Team, 2024) using packages phyloregion v.1.0.9, rangeBuilder v.2.1, usdm version 2.1-6, MaxEnt v.3.4.3, castor v.1.7.10  
Code availability: <https://doi.org/10.5061/dryad.xd2547dqg>

Data availability: Dataset is archived on Dryad at <https://doi.org/10.5061/dryad.xd2547dqg>.



## Data

### *Biodiversity data*

Taxon names: All vascular plants of the world

Taxonomic reference system: Plant occurrence records used for the modeling were compiled from the Global Biodiversity Information Facility (GBIF, <https://doi.org/10.15468/dl.jqqjba>, accessed 2 June 2024), using the query term “Tracheophyta”.

Ecological level: species

Data sources: Plant occurrence records used for the modeling were compiled from the Global Biodiversity Information Facility (GBIF, <https://doi.org/10.15468/dl.jqqjba>, accessed 2 June 2024) using the query term “Tracheophyta”.

Sample size: This yielded 402 million records from 11,517 published datasets.

Scaling: Polygon maps: After data cleaning, we converted the point records into polygon maps by modeling with alpha hulls using the R package rangeBuilder v.2.1. We cropped each species' polygon map to land areas using a basemap from naturalearth (<https://naturalearthdata.com>).

Finally, we systematically sampled these polygon maps to generate 500 points per species for input into the species distribution model (SDM) as in previous studies rather than using the raw and biased point occurrences. Species-specific dispersal rate: We incorporated a partial-dispersal model to prevent erroneous predictions in suitable but unoccupied areas. Specifically, we calculated species-specific dispersal rates using a spherical Brownian motion model (SBM) implemented with the R package castor v.1.7.10. Unlike the widely used Brownian Motion models of continuous trait evolution that encode geographic locations in orthogonal space, the SBM model quantifies the dispersal of a clade over time as a diffusion-like process based on a single diffusion coefficient  $D$ , while accounting for Earth's spherical geometry. The SBM model was fitted using the function `fit_sbm_const` in the R package castor v.1.7.10.

Cleaning: These records were thoroughly cleaned by matching species names from the GBIF occurrences to those in the World Checklist of Vascular Plants (WCVP) and keeping only verified names from WCVP. At the same time, the point records were refined to capture native distributions by intersecting them with WCVP's native range maps of vascular plants within country borders and retaining points that overlap WCVP's range maps.

Background data: We generated background points as a function of global plant sampling intensity to account for the biased sampling in the input occurrence records using spatial kernel density estimation and probabilistic sampling of 10,000 background points for each species within their calibration areas.

### *Data partitioning*

Training data: From the occurrence data as input, we used a 75% random sample for model development, while retaining the remaining 25% sample for model evaluation.

Validation data: For each species, we built models using a combination of hyperparameters in terms of the feature classes and regularization multiplier settings in MaxEnt v.3.4.3 as follows: linear, threshold, and hinge responses, and tested a set of regularization multiplier values (2, 5, 10, 15, 20) under a 5-folds cross-validation framework.

### *Predictor variables*

Predictor variables: Predictor variables for the modeling were downloaded from WorldClim v.2.1 at a spatial grain resolution of 5-arcmin (equivalent to ~9 km at the equator) for present-day conditions (1970-2000) and four future climate scenarios (T1: 2021-2040, T2: 2041-2060, T3: 2061-2080, and T4: 2081-2100) based on MIROC6 and four Shared Socioeconomic Pathways (SSP 126, 245, 370 and 585). These pathways represent varying levels of climate mitigation, ranging from strong mitigation (SSP126) to moderate (SSP245 and SSP370) and high emissions (SSP585) scenarios. We considered 20 predictor variables which are hypothesized to be important for plant distributions and diversity in previous studies. From these predictor variables, we removed areas corresponding to inland waters, i.e., lakes (using vector polygons from <https://naturalearthdata.com>). Variance Inflation Factor (VIF) was calculated among predictor pairs to remove highly autocorrelated predictors using the R package usdm version 2.1-6.

Data sources: WorldClim v.2.1

Spatial extent: -180, 180, -90, 90 (xmin, xmax, ymin, ymax)

Spatial resolution: 5-arcmin (equivalent to ~9 km at the equator)

Coordinate reference system: WGS84

Temporal extent: Present-day conditions (1970-2000) and four future climate scenarios (T1: 2021-2040, T2: 2041-2060, T3: 2061-2080, and T4: 2081-2100) based on MIROC6 and four

Shared Socioeconomic Pathways (SSP 126, 245, 370 and 585). These pathways represent varying levels of climate mitigation, ranging from strong mitigation (SSP126) to moderate (SSP245 and SSP370) and high emissions (SSP585) scenarios

#### *Transfer data*

Spatial extent: -180, 180, -90, 90 (xmin, xmax, ymin, ymax)

Spatial resolution: 5-arcmin (equivalent to ~9 km at the equator)

Models and scenarios: Present-day conditions (1970-2000) and four future climate scenarios (T1: 2021-2040, T2: 2041-2060, T3: 2061-2080, and T4: 2081-2100) based on MIROC6 and four Shared Socioeconomic Pathways (SSP 126, 245, 370 and 585). These pathways represent varying levels of climate mitigation, ranging from strong mitigation (SSP126) to moderate (SSP245 and SSP370) and high emissions (SSP585) scenarios.

### **Model**

#### *Variable pre-selection*

Variable pre-selection: Predictor variables for the modeling were downloaded from WorldClim v.2.1 at a spatial grain resolution of 5-arcmin (equivalent to ~9 km at the equator) for present-day conditions (1970-2000) and four future climate scenarios (T1: 2021-2040, T2: 2041-2060, T3: 2061-2080, and T4: 2081-2100) based on MIROC6 and four Shared Socioeconomic Pathways (SSP 126, 245, 370 and 585). We considered 20 predictor variables which are hypothesized to be important for plant distributions and diversity in previous studies. From these predictor variables, we removed areas corresponding to inland waters, i.e., lakes (using vector polygons from <https://naturalearthdata.com>).

#### *Multicollinearity*

Multicollinearity: Variance Inflation Factor (VIF) was calculated among predictor pairs to assess multicollinearity among predictors using the R package `usdm` version 2.1-6.

#### *Model settings*

Model settings (extrapolation): For each species, we built models using a combination of hyperparameters in terms of the feature classes and regularization multiplier settings in MaxEnt

v.3.4.3 as follows: linear, threshold, and hinge responses, and tested a set of regularization multiplier values (2, 5, 10, 15, 20) under a 5-folds cross-validation framework.

#### *Model estimates*

Coefficients: Our models were predicted over each species' occurrences as a function of present-day bioclimatic variables and using these combinations of settings on a continuous scale between 0 and 1 using the sdm function in phyloregion v.1.0.9.

#### *Model selection - model averaging - ensembles*

Model selection: We generated five sets of models for each species and took the median to account for uncertainties across different model runs.

#### *Threshold selection*

Threshold selection: The suitability of the models for each species was converted to binary presences by using the 95% quantile of the suitability values extracted from the underlying occurrences records as presence threshold.

### **Assessment**

#### *Performance statistics*

Performance on training data: AUC, TSS, Boyce Index

Performance on validation data: AUC, TSS, Boyce Index

Performance on test data: AUC, TSS, Boyce Index

### **Prediction**

#### *Prediction output*

Prediction unit: Species richness, community turnover and areas of refugia.

Data availability: <https://doi.org/10.5061/dryad.xd2547dqc>
